# Supplementary material
Source: publisher site journal article supplement (https://www.dovepress.com/article/586965)
Supplement: Supplementary file 1 [file 586965%20Supplementary%20Material.docx]

Supplementary Table S1. Search Strategies for Each Database

| Database | Search strategy |
| --- | --- |
| PubMed | ("Lumbar Disc Herniation"[MeSH] OR "Intervertebral Disc Displacement"[MeSH] OR "lumbar disc herniation" OR "intervertebral disc herniation" OR LDH OR sciatica) AND ("Acupuncture Therapy"[MeSH] OR acupuncture OR electroacupuncture OR "Governor Vessel" OR "Du meridian" OR Tongdu OR "Wenyang Tongluo" OR "Bushen Huoxue") AND (randomized controlled trial[Publication Type] OR randomized OR randomly OR RCT) |
| Embase | ('lumbar disc herniation'/exp OR 'intervertebral disc herniation' OR LDH OR sciatica) AND ('acupuncture'/exp OR acupuncture OR electroacupuncture OR 'governor vessel' OR 'du meridian' OR tongdu OR 'wenyang tongluo' OR 'bushen huoxue') AND ('randomized controlled trial'/exp OR random*:ti,ab OR rct:ti,ab) |
| Web of Science | TS=("lumbar disc herniation" OR "intervertebral disc herniation" OR LDH OR sciatica) AND TS=(acupuncture OR electroacupuncture OR "Governor Vessel" OR "Du meridian" OR Tongdu OR "Wenyang Tongluo" OR "Bushen Huoxue") AND TS=(randomized OR randomised OR "randomized controlled trial" OR RCT) |
| CINAHL Plus | ("lumbar disc herniation" OR "intervertebral disc herniation" OR LDH OR sciatica) AND (MH "Acupuncture+" OR acupuncture OR electroacupuncture OR "Governor Vessel" OR "Du meridian" OR Tongdu OR "Wenyang Tongluo" OR "Bushen Huoxue") AND (randomized OR randomised OR "randomized controlled trial" OR RCT) |
| AMED | ("lumbar disc herniation" OR "intervertebral disc herniation" OR LDH OR sciatica) AND (acupuncture OR electroacupuncture OR "Governor Vessel" OR "Du meridian" OR Tongdu OR "Wenyang Tongluo" OR "Bushen Huoxue") AND (randomized OR randomised OR "randomized controlled trial" OR RCT) |
| CNKI | ("lumbar disc herniation" OR "intervertebral disc herniation" OR LDH OR sciatica) AND (acupuncture OR electroacupuncture OR "Governor Vessel" OR "Du meridian" OR Tongdu OR "Wenyang Tongluo" OR "Bushen Huoxue") AND (randomized OR randomised OR "randomized controlled trial" OR RCT) |
| Wanfang | ("lumbar disc herniation" OR "intervertebral disc herniation" OR LDH OR sciatica) AND (acupuncture OR electroacupuncture OR "Governor Vessel" OR "Du meridian" OR Tongdu OR "Wenyang Tongluo" OR "Bushen Huoxue") AND (randomized OR randomised OR "randomized controlled trial" OR RCT) |
| VIP | ("lumbar disc herniation" OR "intervertebral disc herniation" OR LDH OR sciatica) AND (acupuncture OR electroacupuncture OR "Governor Vessel" OR "Du meridian" OR Tongdu OR "Wenyang Tongluo" OR "Bushen Huoxue") AND (randomized OR randomised OR "randomized controlled trial" OR RCT) |
| CBM | ("lumbar disc herniation" OR "intervertebral disc herniation" OR LDH OR sciatica) AND (acupuncture OR electroacupuncture OR "Governor Vessel" OR "Du meridian" OR Tongdu OR "Wenyang Tongluo" OR "Bushen Huoxue") AND (randomized OR randomised OR "randomized controlled trial" OR RCT) |
